# Supplementary material for: Behavior of carbon monoxide, nitrogen oxides, and ozone in a vehicle cabin with a passenger
Source: Royal Society of Chemistry journal article supplement (doi:10.1039/d0em00395f), 2021-01-01
Supplement: d0em00395f1.pdf [file d0em00395f1.pdf]

## Supporting Information

### **Behavior of carbon monoxide, nitrogen oxides, and ozone in vehicle cabin with a passenger**

David Mendez-Jimenez<sup>1,2,+</sup>, Pascale S. J. Lakey<sup>3</sup>, Manabu Shiraiwa<sup>3</sup>, Heejung Jung<sup>1,2,\*</sup>

<sup>1</sup>Department of Mechanical Engineering, University of California, Riverside

<sup>2</sup>CE-CERT, University of California, Riverside

<sup>3</sup>Department of Chemistry, University of California, Irvine

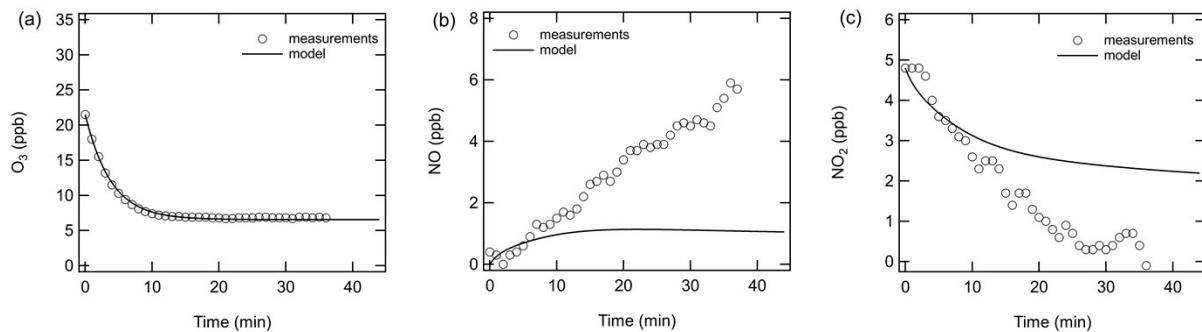

Figure S1: Concentrations of (a) O<sub>3</sub>, (b) NO and (c) NO<sub>2</sub> predicted by the model at midnight when an ozone production rate of  $8.1 \times 10^8$  molecule cm<sup>-3</sup> s<sup>-1</sup> was included in the model in order to match ozone concentrations. All other parameters were kept consistent with those found in Table S1.

Table S1: Gas-phase reactions and deposition rates to vehicle surfaces included in the kinetic model.

| <b>Reaction</b>                       | <b>Rate (cm<sup>6</sup> s<sup>-2</sup>, cm<sup>3</sup> s<sup>-1</sup> or s<sup>-1</sup>)</b> | <b>Comment or reference</b>                                                                                                                                                                                                                                                                       |
|---------------------------------------|----------------------------------------------------------------------------------------------|---------------------------------------------------------------------------------------------------------------------------------------------------------------------------------------------------------------------------------------------------------------------------------------------------|
| $O_3 + h\nu \rightarrow O + O_2$      | 0 (midnight), $\leq 2.3 \times 10^{-8}$ (midday and sunset)                                  | $2.3 \times 10^{-8} \text{ s}^{-1}$ was measured indoors in direct sunlight in Table S5 of a different study [26] (values are likely to be lower as the inside of the car will not be in direct sunlight). Model results are insensitive at all values $\leq 2.3 \times 10^{-8} \text{ s}^{-1}$ . |
| $O + O_2 (+ M) \rightarrow O_3 (+ M)$ | $1.4 \times 10^{-14}$                                                                        | IUPAC recommended value                                                                                                                                                                                                                                                                           |
| $NO + O_3 \rightarrow NO_2 + O_2$     | $1.9 \times 10^{-14}$                                                                        | IUPAC recommended value                                                                                                                                                                                                                                                                           |
| $NO_2 + h\nu \rightarrow NO + O$      | 0 (midnight), $\leq 1.4 \times 10^{-4}$ (midday and sunset)                                  | $1.4 \times 10^{-3} \text{ s}^{-1}$ was measured indoors in direct sunlight in Table S10 of a different study [26] (values are likely to be lower as the inside of the car will not be in direct sunlight). The transmission through car windows may also be different. Therefore, the value      |

|                                                                           |                                                                                                                                    |                                                                                                                                               |
|---------------------------------------------------------------------------|------------------------------------------------------------------------------------------------------------------------------------|-----------------------------------------------------------------------------------------------------------------------------------------------|
|                                                                           |                                                                                                                                    | was divided by at least a factor of 10). NO <sub>2</sub> decay rates are insensitive at all values ≤ 1.4 × 10 <sup>-4</sup> s <sup>-1</sup> . |
| $O_3 + NO_2 \rightarrow NO_3 + O_2$                                       | $3.5 \times 10^{-17}$                                                                                                              | IUPAC recommended value                                                                                                                       |
| $NO_2 + NO_3 (+ M) \rightarrow N_2O_5 (+ M)$                              | $3.5 \times 10^{-12}$                                                                                                              | IUPAC recommended value                                                                                                                       |
| $N_2O_5 (+ M) \rightarrow NO_2 + NO_3 (+ M)$                              | $6.9 \times 10^{-2}$                                                                                                               | IUPAC recommended value                                                                                                                       |
| $N_2O_5 + H_2O \rightarrow 2HNO_3$ (on surfaces)                          | Varied                                                                                                                             | So far not sensitive in the model                                                                                                             |
| $O_3 + 6\text{-MHO} \rightarrow \text{Products}$                          | $4.3 \times 10^{-16}$                                                                                                              | EPIWIN                                                                                                                                        |
| $O_3 + \text{Geranyl acetone} \rightarrow \text{Products}$                | $8.6 \times 10^{-16}$                                                                                                              | EPIWIN                                                                                                                                        |
| $O_3 + \text{Isoprene} \rightarrow \text{Products}$                       | $1.3 \times 10^{-17}$                                                                                                              | EPIWIN                                                                                                                                        |
| O <sub>3</sub> reaction with gas-phase VOCs or deposition to car surfaces | $3.0 \times 10^{-3}$ (first order loss rate from the gas-phase).                                                                   | It is known that ozone will react with indoor surfaces                                                                                        |
| NO <sub>2</sub> deposition to car surfaces with a certain yield of NO     | $1.5 \times 10^{-3}$ (first order loss rate from the gas-phase). NO yield was set to 0.4 - 1 as this gave the best fit to the data | There are papers that suggest that one of the products of NO <sub>2</sub> deposition to surfaces is NO (e.g. [22])                            |

|                                                                                 |                                                             |                                                                                                                                                                                                                                                                                                   |
|---------------------------------------------------------------------------------|-------------------------------------------------------------|---------------------------------------------------------------------------------------------------------------------------------------------------------------------------------------------------------------------------------------------------------------------------------------------------|
| $\text{CO} + \text{OH} \rightarrow \text{CO}_2 + \text{H}$                      | $2.1 \times 10^{-13}$                                       | IUPAC recommended value                                                                                                                                                                                                                                                                           |
| $\text{H} + \text{O}_2 \rightarrow \text{HO}_2$                                 | $1.0 \times 10^{-12}$                                       | IUPAC recommended value                                                                                                                                                                                                                                                                           |
| $\text{HO}_2 + \text{NO} \rightarrow \text{NO}_2 + \text{OH}$                   | $8.5 \times 10^{-12}$                                       | IUPAC recommended value                                                                                                                                                                                                                                                                           |
| $\text{OH} + \text{NO}_2 \rightarrow \text{HNO}_3$                              | $3.0 \times 10^{-11}$                                       | IUPAC recommended value                                                                                                                                                                                                                                                                           |
| $\text{HO}_2 + \text{HO}_2 \rightarrow \text{H}_2\text{O}_2 + \text{O}_2$       | $1.6 \times 10^{-12}$                                       | IUPAC recommended value                                                                                                                                                                                                                                                                           |
| $\text{H}_2\text{O}_2 + h\nu \rightarrow \text{OH} + \text{OH}$                 | 0 (midnight), $\leq 1.4 \times 10^{-7}$ (midday and sunset) | $1.4 \times 10^{-7} \text{ s}^{-1}$ was measured indoors in direct sunlight in Table S5 of a different study [26] (values are likely to be lower as the inside of the car will not be in direct sunlight). Model results are insensitive at all values $\leq 1.4 \times 10^{-7} \text{ s}^{-1}$ . |
| $\text{H}_2\text{O}_2 + \text{OH} \rightarrow \text{HO}_2 + \text{H}_2\text{O}$ | $1.7 \times 10^{-12}$                                       | IUPAC recommended value                                                                                                                                                                                                                                                                           |
